# Supplementary material for: Synthesis of a New Dinuclear Cu(I) Complex with Triazine Ligand and diphenylphosphine methane: X-ray Structure, Optical properties, DFT calculations and application in DSSC
Source: Preprints.org preprint supplement (doi:10.20944/preprints202309.0204.v1), 2023-09-04
Supplement: Supplementary file 2 [file supplementary]

**Supporting information**

**Synthesis of a New Dinuclear Cu(I) Complex with Triazine Ligand and diphenylphosphine methane: X-ray Structure, Optical properties, DFT calculations and application in DSSC.**


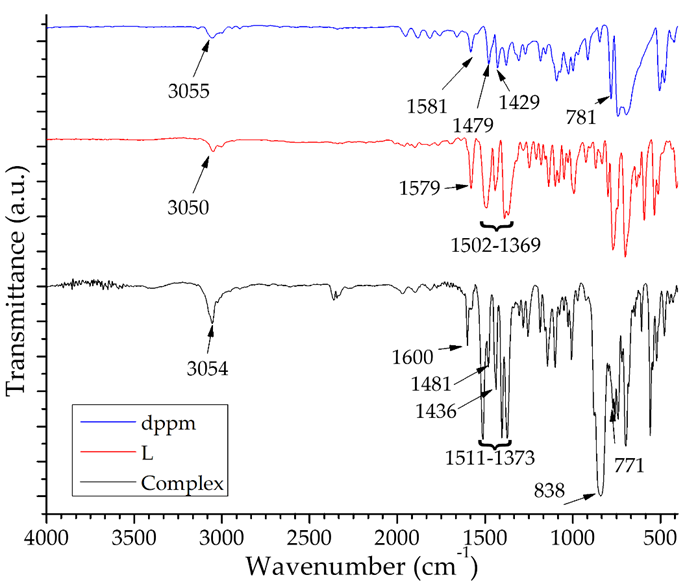


Figure S1. Infrared spectra of complex and the corresponding starting materials.


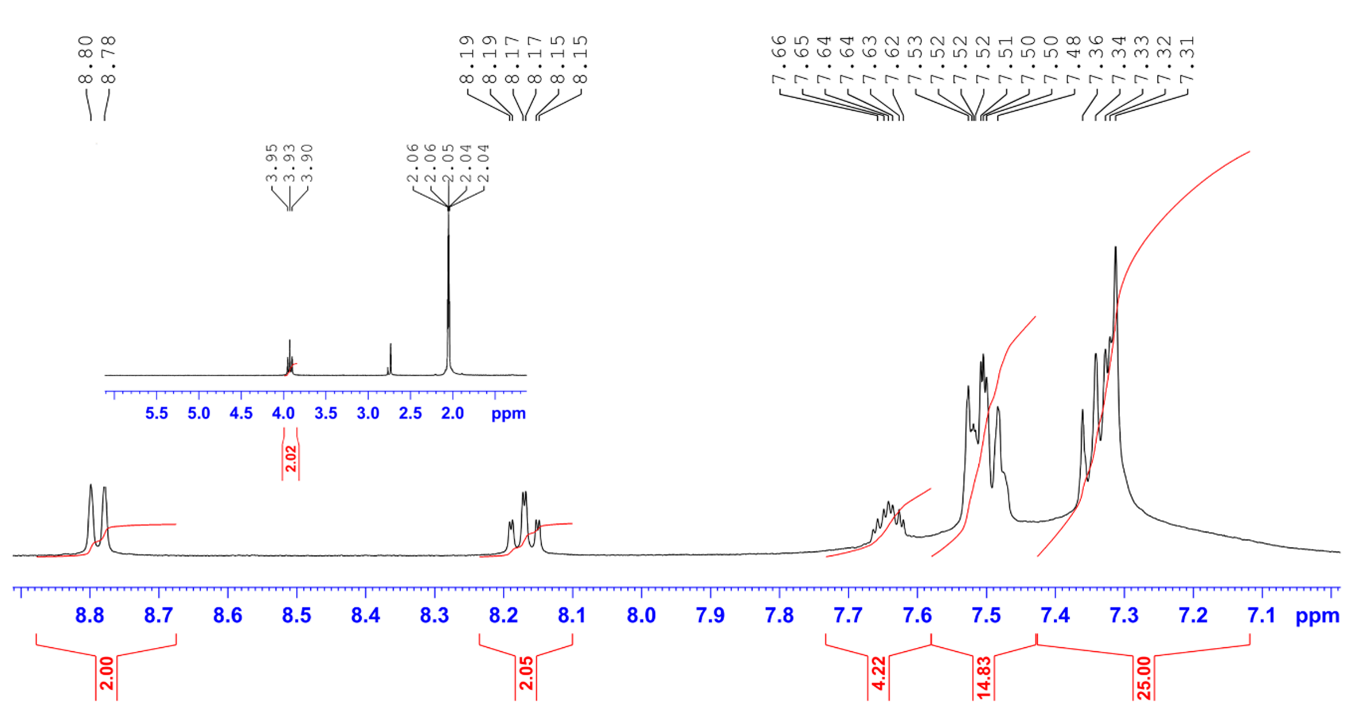


**Figure S2.** 1H NMR spectrum of the complexin acetone-*d6.*


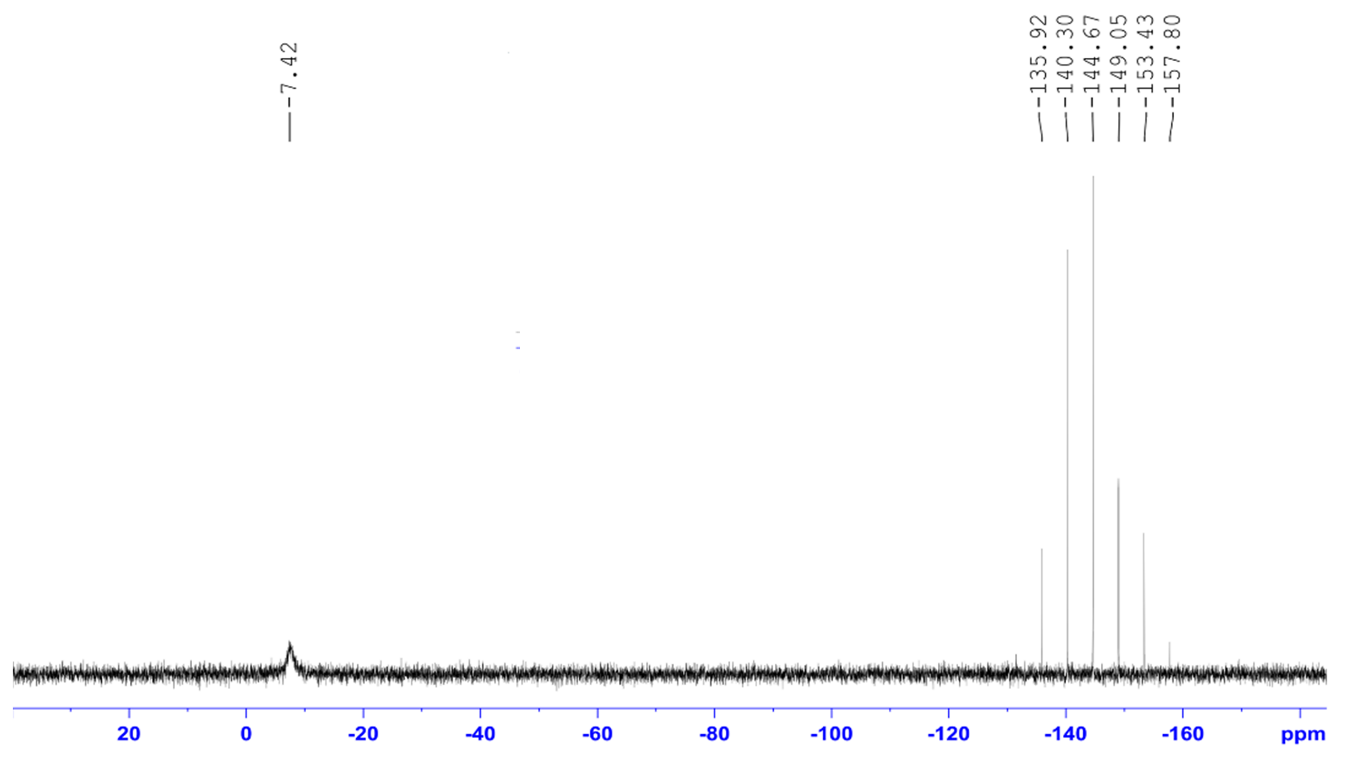


**Figure S3.** 31P NMR spectrum of the complexin acetone-*d6.*

**Table S1.** Geometries of intermolecular hydrogen bonds and π···π contacts in complex **1**.

| **D-H···A** | **D-H (Å)** | **H···A (Å)** | **D···A (Å)** | **D-H···A (°)** | **Symmetry codes** |
| --- | --- | --- | --- | --- | --- |
| C62-H62···N7 | 0.95 | 2.65 | 3.565(6) | 161 | -1/2+x,-1/2+y,-1/2+z |
| C1-H1A···F1 | 0.99 | 2.63 | 3.603(6) | 166 | x,y,x |
| C8-H8···F8 | 0.95 | 2.53 | 3.372(8) | 147 | -x+1,-y+1,-z+1 |
| C8-H8···F9 | 0.95 | 2.49 | 3.065(7) | 119 | -x+1,-y+1,-z+1 |
| C40-H40···F7 | 0.95 | 2.63 | 3.582(6) | 17 | -x,-y+1,-z+1 |
| C40-H40···F10 | 0.95 | 2.47 | 3.214(4) | 135 | -x,-y+1,-z+1 |
| C46-H46···F5 | 0.95 | 2.59 | 3.434(7) | 147 | x-1/2,-y+1/2,+z-1/2 |
| C47-H47···F2 | 0.95 | 2.57 | 3.323(8) | 136 | x-1/2,-y+1/2,+z-1/2 |
| C49-H49···F1 | 0.95 | 2.50 | 3.365(8) | 150 | x,y,x |
| C61-H61···F3 | 0.95 | 2.49 | 3.222(6) | 133 | x,y,x |
| C63-H63···F10 | 0.94 | 2.30 | 3.219(6) | 162 | -x+1/2,+y-1/2,-z+1.5 |
| C9-H9···πa | 0.95 | 3.58 | 4.336 | 138 | -x+1,-y+1,-z+1 |
| C17-H17···πb | 0.95 | 3.46 | 3.943 | 114 | -x+1/2,+y-1/2,-z+1.5 |
| C33-H33 ···πc | 0.95 | 3.53 | 4.105 | 121 | -x+1/2,+y-1/2,-z+1/2 |
| π···πd |  |  | 3.756 |  | -x+1,-y+1,-z+1 |

a Centroid: C25, C26, C27, C28, C29, C30

b Centroid: C60, C61, C62, C63, C64, C65

c Centroid: C42, C43, C44, C45, C46, C47

d Centroids: N4, C5, C9, C6, C8, C7 and C5, C8, C9, C6, C7, N6


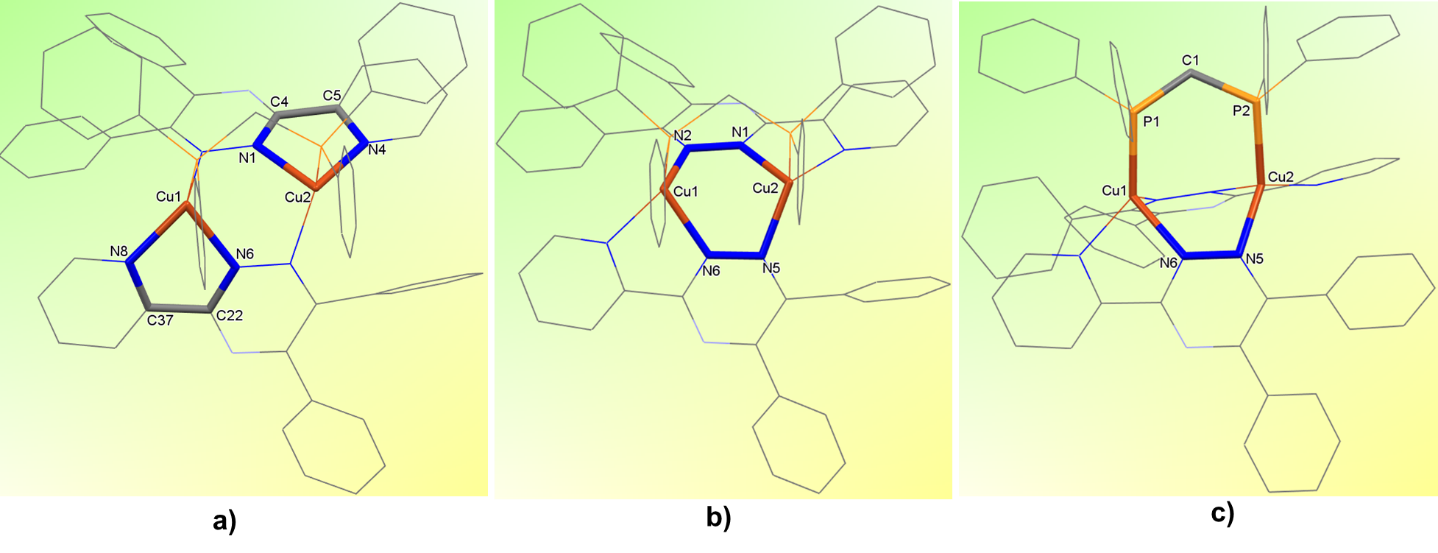


**Figure S4**. Perspective views of [Cu2(L)2dppm]+ in the crystal structure of **1**, showing a) two five-membered Cu-N-C-C-N, b) one six-membered Cu-N-N-Cu-N-N and c) one seven-membered Cu-N-N-Cu-P-C-P chelate rings. Hydrogen atoms have been omitted for clarity.


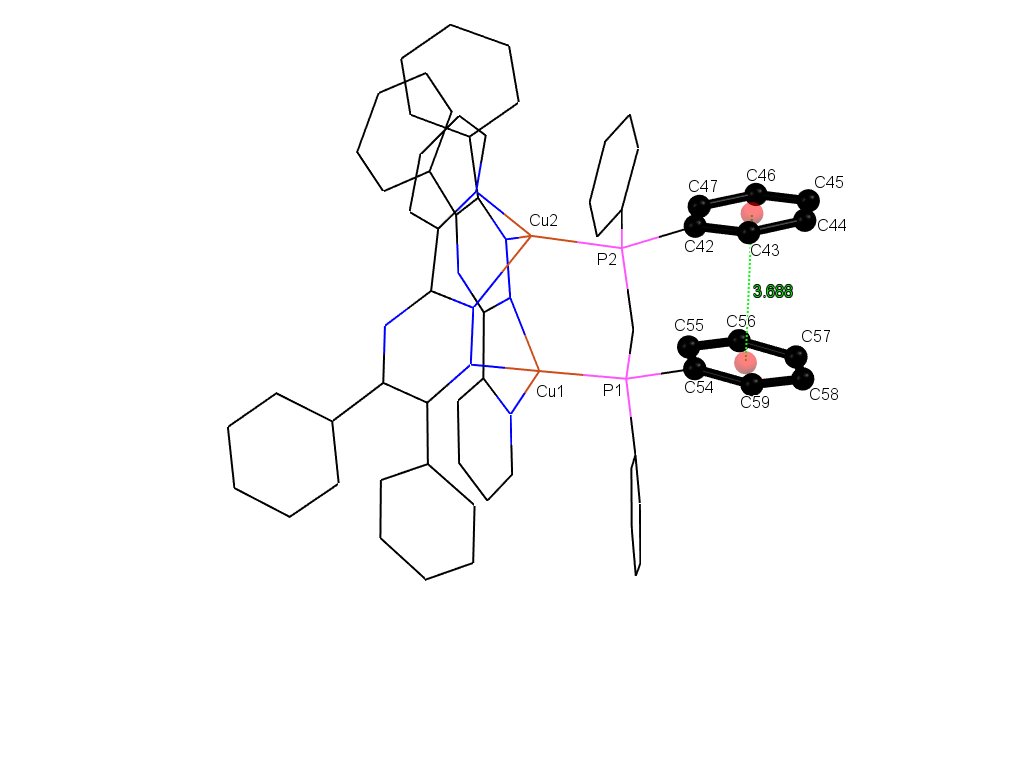

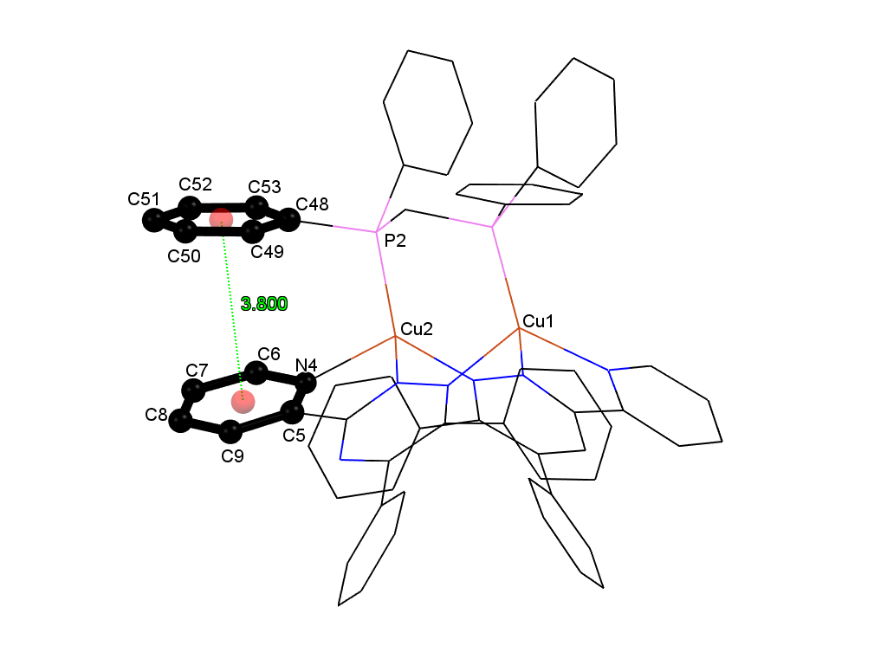


**Figure S5**. Intramolecular π···π interactions in the crystal structure of **1**. Hydrogen atoms have been omitted for clarity.


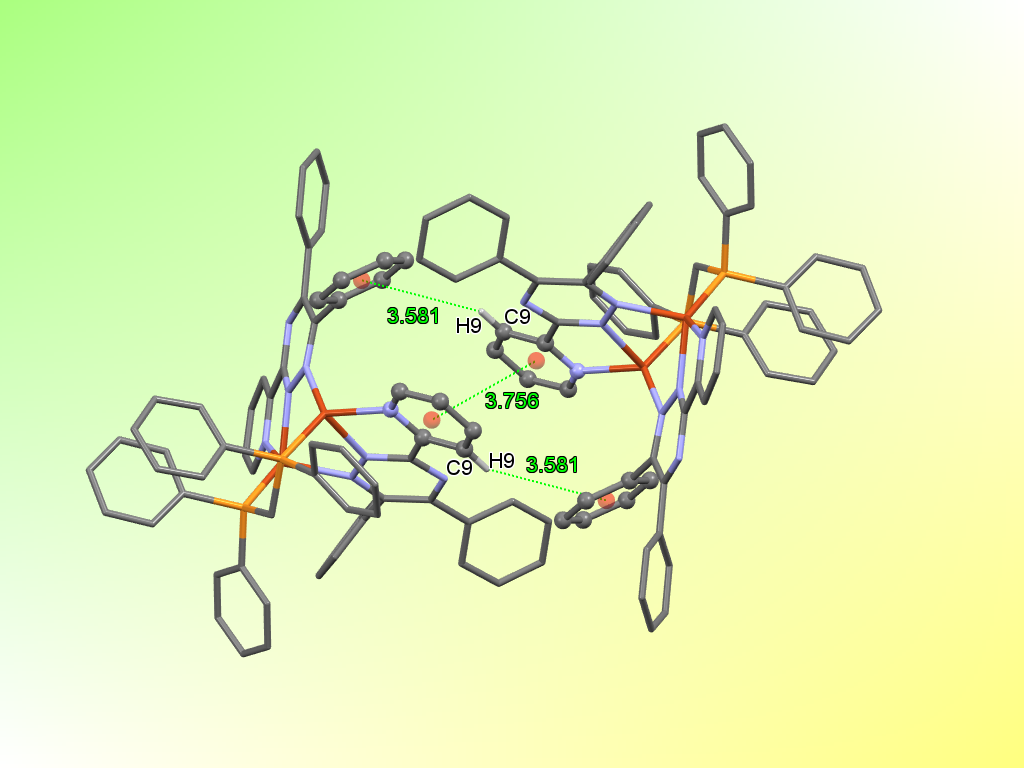


**Figure S6**. Intermolecular C-H··· π and π- stacking interactions between pair of [Cu2(L)2dppm]+ cations. Hydrogen atoms have been omitted for clarity.


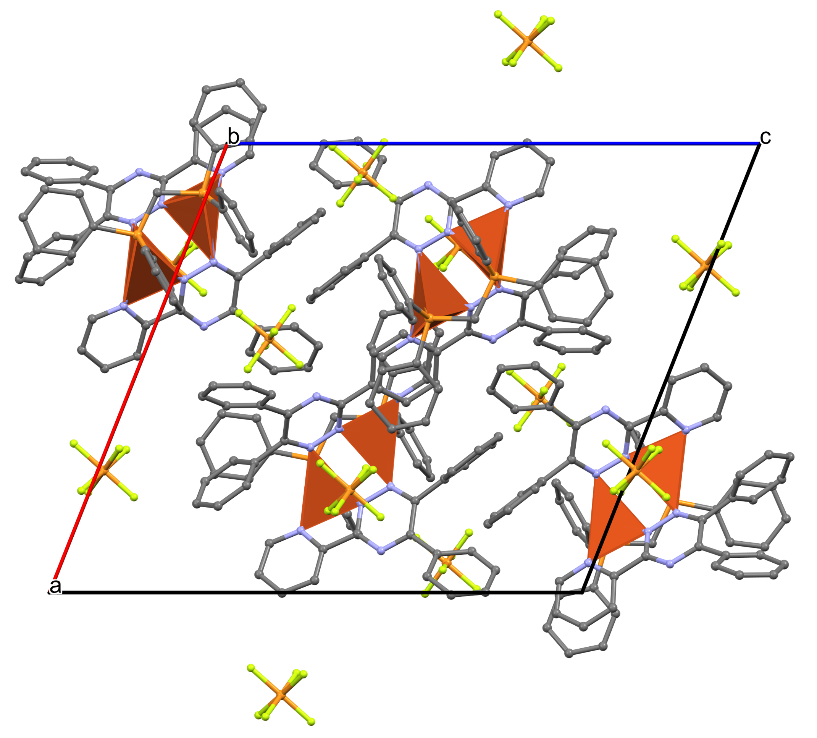


**Figure S7**. Perspective view of the three-dimensional (3D) hydrogen-bonded network in the crystal structure of complex **1**, formed through C-H···N, C-H···F, C-H···π and π···π interactions. Hydrogen atoms have been omitted for clarity*.*


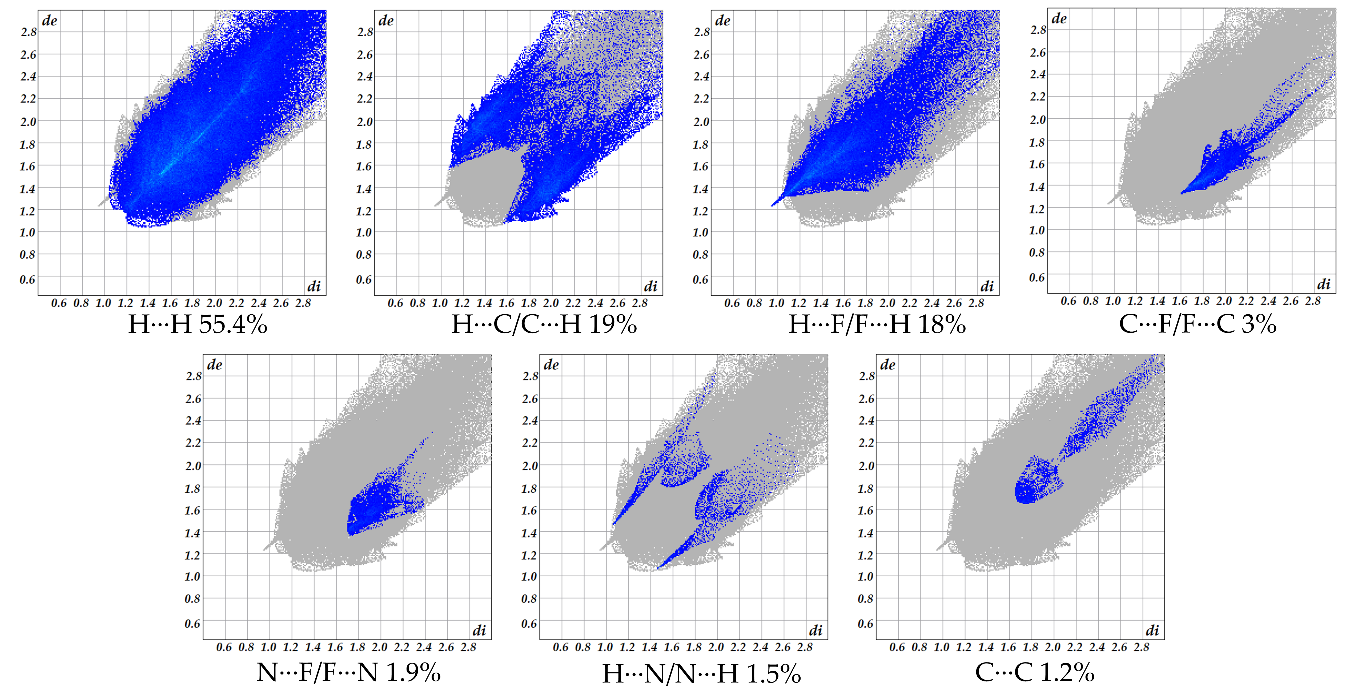


Figure S8. Percentages of intermolecular interactions in the fingerprint plot for complex **1**.


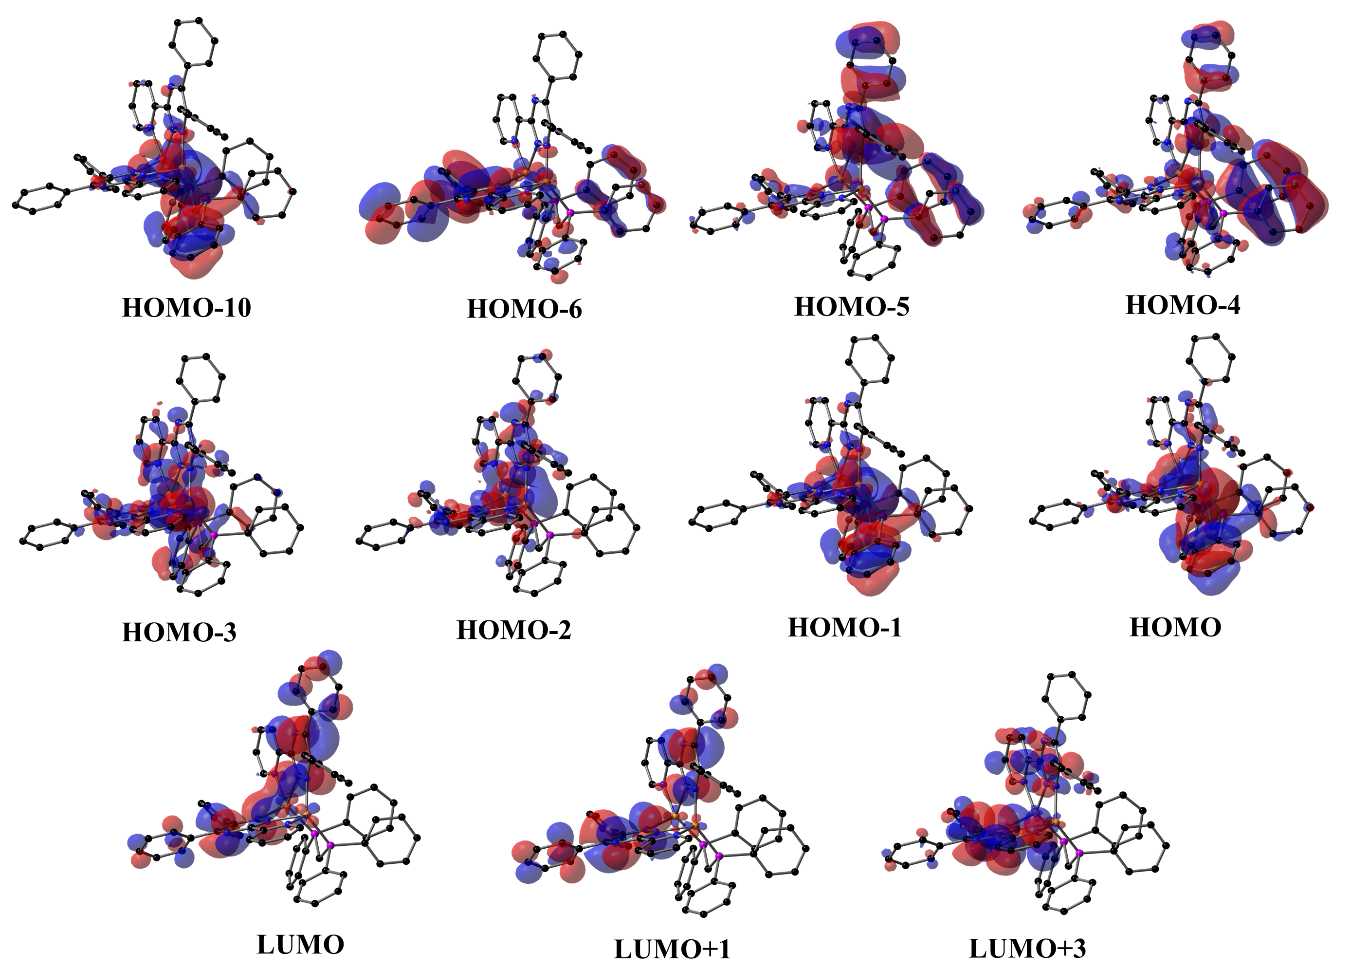


**Figure S9**. HOMO and LUMO frontier orbital plots of the title complex on TD-DFT calculations.


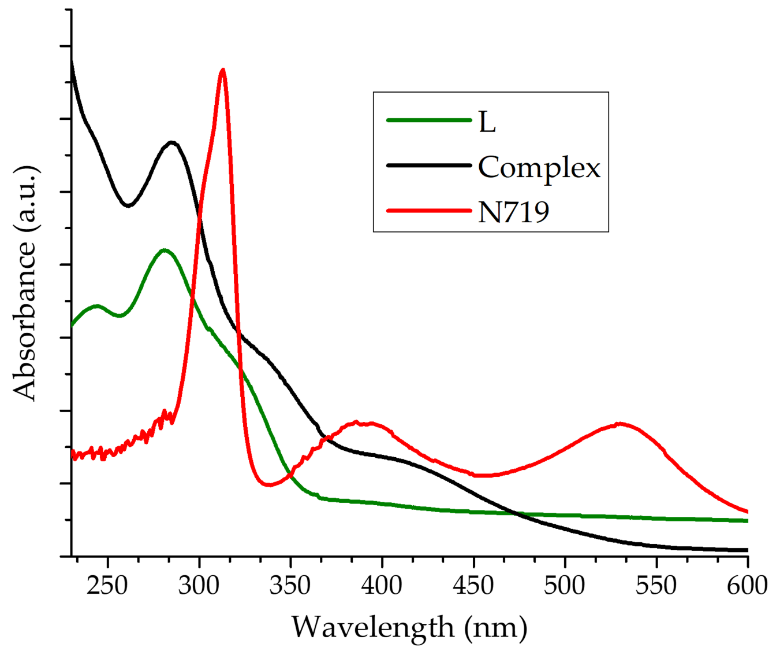


Figure S10. UV-Vis absorption spectra of complex, free ligand L and N719 recorded in 2x10-5 mol/L solution in ethanol.


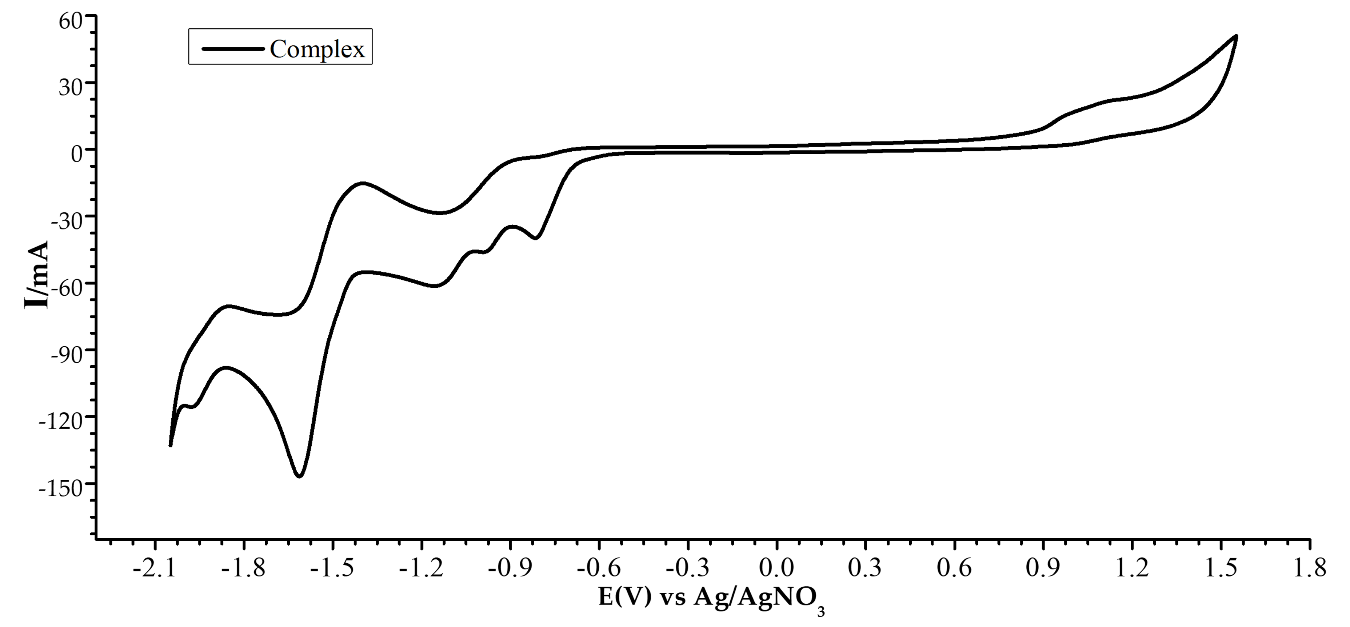


**Figure S11.** Cyclic voltammogram of[Cu2(L)2dppm](PF6)2(5x10-3 M) in acetonitrile at *T* = 298 K using NBu4PF6 (0.1 M) as supporting electrolyte (scan rate = 20 mVs-1).
